# Supplementary figures and images for: Genomic and phenotypic consequences of two independent secondary contact zones between allopatric lineages of the anadromous ice goby Leucopsarion petersii
Source: Springer Nature journal article supplement (doi:10.1038/s41437-019-0239-6), 2019-06-11

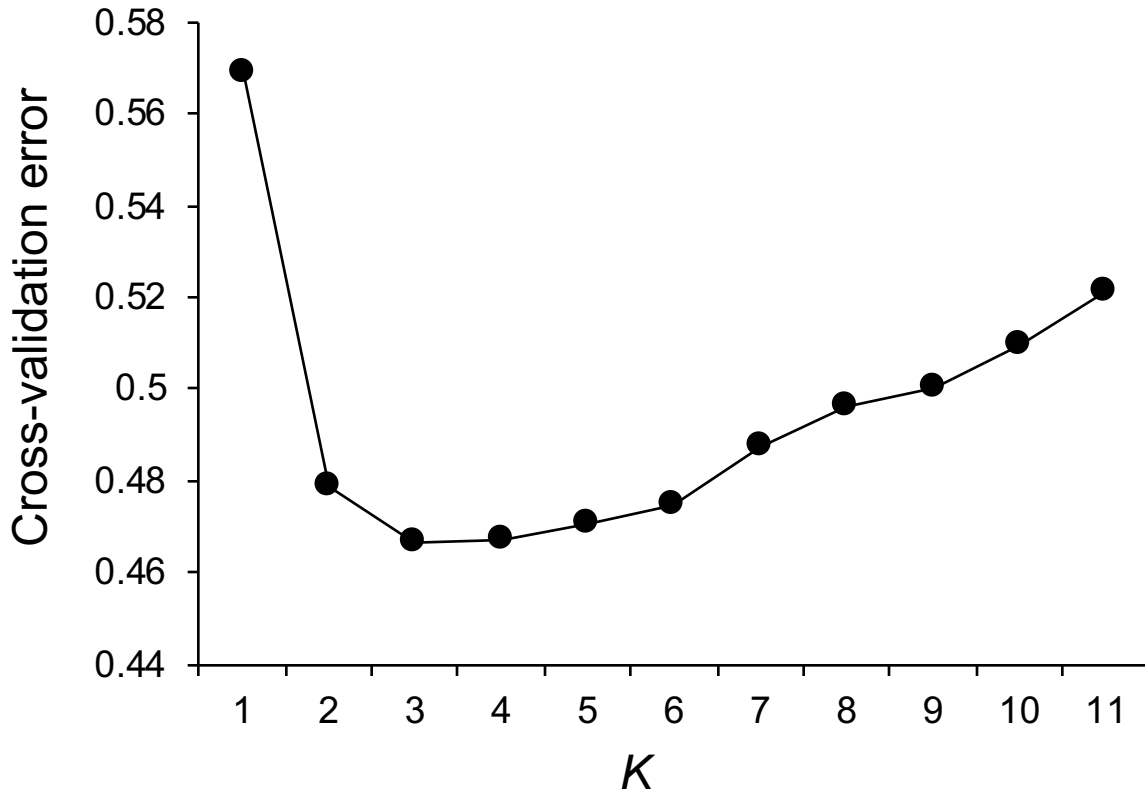

Supplement: 41437_2019_239_MOESM3_ESM.pdf [file 41437_2019_239_MOESM3_ESM.pdf]
